# Supplementary material
Source: Research Square preprint supplement (doi:10.21203/rs.3.rs-9270520/v1)
Supplement: Supplementary file 1 [file 7fcaff4538956208f0379e14.pdf]

# Supplementary Materials for Modeling citations and cartels

Minhyuk Park<sup>1</sup>, Haotian Yi<sup>1</sup>, Ian Chen Wei<sup>i</sup>, Tandy Warnow<sup>1</sup>, and George Chacko<sup>1,\*</sup>

<sup>1</sup>Siebel School of Computing and Data Science, University of Illinois Urbana-Champaign, Urbana, IL, 61801

\*chackoge@illinois.edu

## 1 Additional Figures

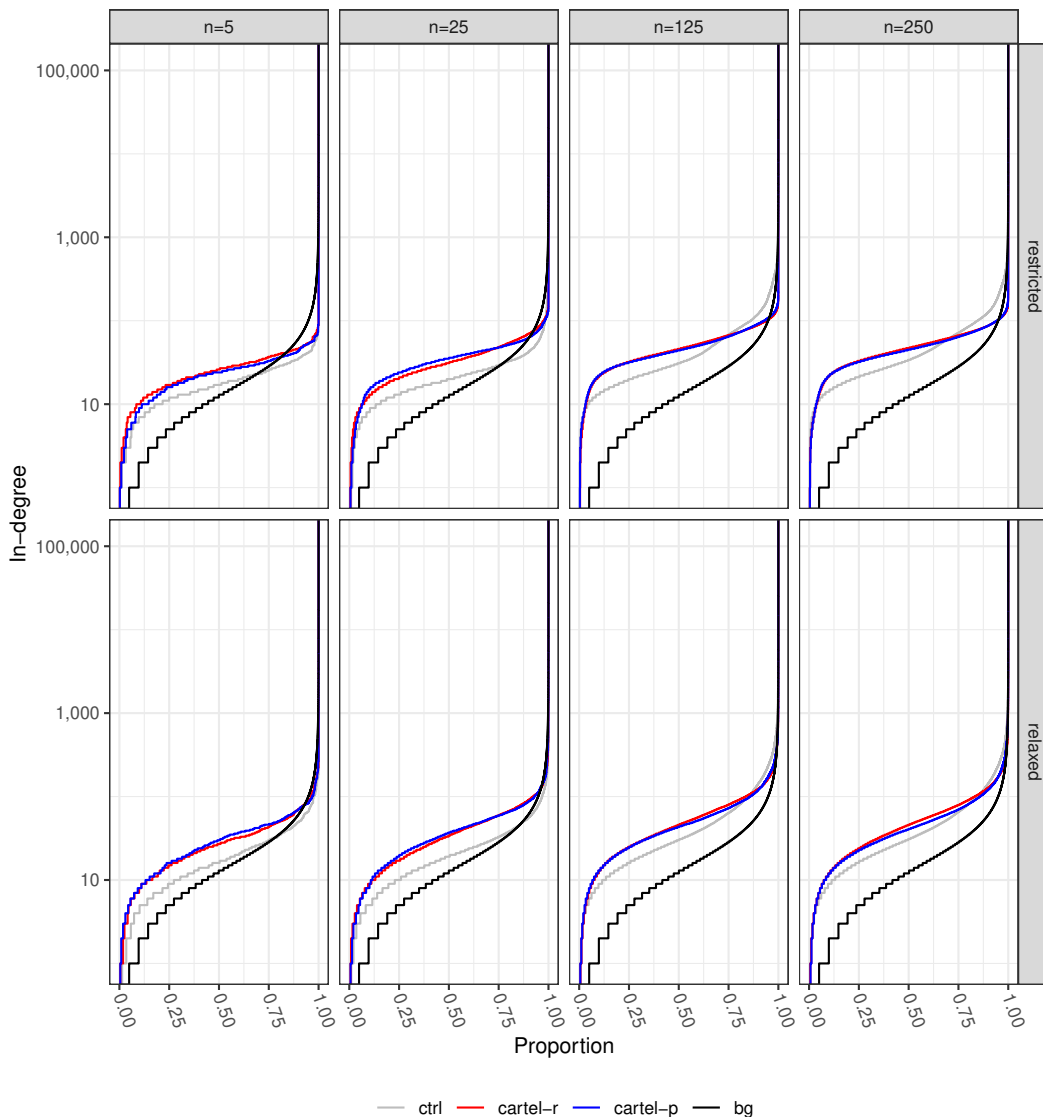

**Figure S1.** Publication in-degree grouped by author cartel memberships. Cartels show left-shifted curves. *bg* denotes the background authors, meaning all agent nodes that are not part of *ctrl*, *cartel-r*, or *cartel-p*. The x-axis shows the proportion of nodes that are at least *y* in-degree according to the y-axis.

## 2 Additional Tables

**Table S1.** Summary statistics of in-degree percentiles of cartel members. Here we show the different percentiles of publication in-degrees grouped by members (citations for publications by each member are summed)

|            |          | cartel size | min | Q1 | median | Q3 | 90th | 99th | max    |
|------------|----------|-------------|-----|----|--------|----|------|------|--------|
| Restricted | ctrl     | 5           | 0   | 12 | 18     | 26 | 35   | 63   | 127    |
|            | cartel-r | 5           | 0   | 17 | 26     | 37 | 47   | 75   | 117    |
|            | cartel-p | 5           | 0   | 15 | 25     | 33 | 44   | 67   | 99     |
|            | bg-agent | 5           | 0   | 5  | 12     | 28 | 59   | 301  | 85165  |
| Restricted | ctrl     | 25          | 0   | 14 | 20     | 30 | 42   | 133  | 929    |
|            | cartel-r | 25          | 0   | 21 | 32     | 48 | 70   | 115  | 150    |
|            | cartel-p | 25          | 0   | 24 | 36     | 48 | 63   | 112  | 163    |
|            | bg-agent | 25          | 0   | 5  | 12     | 28 | 59   | 300  | 116612 |
| Restricted | ctrl     | 125         | 0   | 20 | 31     | 67 | 120  | 446  | 2452   |
|            | cartel-r | 125         | 0   | 32 | 46     | 67 | 90   | 132  | 207    |
|            | cartel-p | 125         | 0   | 32 | 44     | 65 | 93   | 141  | 315    |
|            | bg-agent | 125         | 0   | 5  | 12     | 28 | 59   | 297  | 104242 |
| Restricted | ctrl     | 250         | 0   | 21 | 34     | 71 | 125  | 432  | 2618   |
|            | cartel-r | 250         | 0   | 33 | 47     | 67 | 88   | 131  | 239    |
|            | cartel-p | 250         | 0   | 32 | 45     | 64 | 88   | 136  | 487    |
|            | bg-agent | 250         | 0   | 4  | 12     | 27 | 58   | 297  | 101918 |
| Relaxed    | ctrl     | 5           | 0   | 9  | 17     | 30 | 50   | 144  | 216    |
|            | cartel-r | 5           | 0   | 15 | 27     | 43 | 70   | 177  | 339    |
|            | cartel-p | 5           | 0   | 15 | 30     | 47 | 69   | 166  | 271    |
|            | bg-agent | 5           | 0   | 5  | 12     | 28 | 59   | 300  | 94273  |
| Relaxed    | ctrl     | 25          | 0   | 10 | 20     | 33 | 56   | 164  | 793    |
|            | cartel-r | 25          | 0   | 17 | 34     | 60 | 90   | 219  | 15920  |
|            | cartel-p | 25          | 0   | 19 | 37     | 59 | 86   | 206  | 1601   |
|            | bg-agent | 25          | 0   | 5  | 12     | 27 | 59   | 301  | 100676 |
| Relaxed    | ctrl     | 125         | 0   | 16 | 30     | 63 | 141  | 587  | 8835   |
|            | cartel-r | 125         | 0   | 24 | 45     | 79 | 124  | 330  | 1604   |
|            | cartel-p | 125         | 0   | 24 | 43     | 72 | 119  | 347  | 3585   |
|            | bg-agent | 125         | 0   | 4  | 12     | 27 | 59   | 296  | 98196  |
| Relaxed    | ctrl     | 250         | 0   | 16 | 31     | 64 | 142  | 584  | 13440  |
|            | cartel-r | 250         | 0   | 23 | 45     | 79 | 127  | 323  | 3701   |
|            | cartel-p | 250         | 0   | 22 | 40     | 69 | 120  | 389  | 4594   |
|            | bg-agent | 250         | 0   | 4  | 12     | 27 | 58   | 296  | 97891  |

**Table S2.** Summary statistics of in\_degree for cartel nodes under different counterfactual simulations. Percentiles shown are inferred for cartel nodes through the empirical cumulative distribution function (ecdf) for background nodes (non-cartel agents)

|    | model    | crtl_size | crtl_n_bg | n_crtl | crtl_indeg_min | crtl_indeg_q1 | crtl_indeg_median | crtl_indeg_mean | crtl_indeg_q3 | crtl_indeg_max | ptile_min | ptile_q1 | ptile_median | ptile_mean | ptile_q3 | ptile_max | tag   |
|----|----------|-----------|-----------|--------|----------------|---------------|-------------------|-----------------|---------------|----------------|-----------|----------|--------------|------------|----------|-----------|-------|
| 1  | cartel-p | 5         | 2104260   | 450    | 0              | 15.25         | 25                | 25.81           | 33            | 99             | 0.07      | 0.58     | 0.73         | 0.67       | 0.80     | 0.95      | restr |
| 2  | cartel-p | 25        | 2102460   | 2250   | 0              | 24.00         | 36                | 37.71           | 48            | 163            | 0.07      | 0.72     | 0.82         | 0.75       | 0.87     | 0.98      | restr |
| 3  | cartel-p | 125       | 2093460   | 11250  | 0              | 32.00         | 44                | 50.44           | 65            | 315            | 0.07      | 0.79     | 0.86         | 0.81       | 0.91     | 0.99      | restr |
| 4  | cartel-p | 250       | 2082210   | 22500  | 0              | 32.00         | 45                | 49.80           | 64            | 487            | 0.07      | 0.79     | 0.86         | 0.81       | 0.91     | 0.99      | restr |
| 5  | cartel-r | 5         | 2104260   | 450    | 0              | 17.00         | 26                | 27.94           | 37            | 117            | 0.07      | 0.62     | 0.74         | 0.69       | 0.82     | 0.96      | restr |
| 6  | cartel-r | 25        | 2102460   | 2250   | 0              | 21.00         | 32                | 37.00           | 48            | 150            | 0.07      | 0.68     | 0.79         | 0.74       | 0.87     | 0.97      | restr |
| 7  | cartel-r | 125       | 2093460   | 11250  | 0              | 32.00         | 46                | 50.75           | 67            | 207            | 0.07      | 0.79     | 0.86         | 0.81       | 0.92     | 0.98      | restr |
| 8  | cartel-r | 250       | 2082210   | 22500  | 0              | 33.00         | 47                | 50.93           | 67            | 239            | 0.07      | 0.80     | 0.87         | 0.81       | 0.92     | 0.99      | restr |
| 9  | crtl     | 5         | 2104260   | 450    | 0              | 12.00         | 18                | 19.98           | 26            | 127            | 0.07      | 0.51     | 0.63         | 0.60       | 0.74     | 0.97      | restr |
| 10 | crtl     | 25        | 2102460   | 2250   | 0              | 14.00         | 20                | 26.19           | 30            | 929            | 0.07      | 0.56     | 0.67         | 0.64       | 0.78     | 1.00      | restr |
| 11 | crtl     | 125       | 2093460   | 11250  | 0              | 20.00         | 31                | 59.19           | 67            | 2452           | 0.07      | 0.67     | 0.79         | 0.76       | 0.92     | 1.00      | restr |
| 12 | crtl     | 250       | 2082210   | 22500  | 0              | 21.00         | 34                | 62.15           | 71            | 2618           | 0.07      | 0.68     | 0.81         | 0.77       | 0.92     | 1.00      | restr |
| 13 | cartel-p | 5         | 2104260   | 450    | 0              | 15.25         | 25                | 25.81           | 33            | 99             | 0.07      | 0.58     | 0.73         | 0.67       | 0.80     | 0.95      | relex |
| 14 | cartel-p | 25        | 2102460   | 2250   | 0              | 24.00         | 36                | 37.71           | 48            | 163            | 0.07      | 0.72     | 0.82         | 0.75       | 0.87     | 0.98      | relex |
| 15 | cartel-p | 125       | 2093460   | 11250  | 0              | 32.00         | 44                | 50.44           | 65            | 315            | 0.07      | 0.79     | 0.86         | 0.81       | 0.91     | 0.99      | relex |
| 16 | cartel-p | 250       | 2082210   | 22500  | 0              | 32.00         | 45                | 49.80           | 64            | 487            | 0.07      | 0.79     | 0.86         | 0.81       | 0.91     | 0.99      | relex |
| 17 | cartel-r | 5         | 2104260   | 450    | 0              | 17.00         | 26                | 27.94           | 37            | 117            | 0.07      | 0.62     | 0.74         | 0.69       | 0.82     | 0.96      | relex |
| 18 | cartel-r | 25        | 2102460   | 2250   | 0              | 21.00         | 32                | 37.00           | 48            | 150            | 0.07      | 0.68     | 0.79         | 0.74       | 0.87     | 0.97      | relex |
| 19 | cartel-r | 125       | 2093460   | 11250  | 0              | 32.00         | 46                | 50.75           | 67            | 207            | 0.07      | 0.79     | 0.86         | 0.81       | 0.92     | 0.98      | relex |
| 20 | cartel-r | 250       | 2082210   | 22500  | 0              | 33.00         | 47                | 50.93           | 67            | 239            | 0.07      | 0.80     | 0.87         | 0.81       | 0.92     | 0.99      | relex |
| 21 | crtl     | 5         | 2104260   | 450    | 0              | 12.00         | 18                | 19.98           | 26            | 127            | 0.07      | 0.51     | 0.63         | 0.60       | 0.74     | 0.97      | relex |
| 22 | crtl     | 25        | 2102460   | 2250   | 0              | 14.00         | 20                | 26.19           | 30            | 929            | 0.07      | 0.56     | 0.67         | 0.64       | 0.78     | 1.00      | relex |
| 23 | crtl     | 125       | 2093460   | 11250  | 0              | 20.00         | 31                | 59.19           | 67            | 2452           | 0.07      | 0.67     | 0.79         | 0.76       | 0.92     | 1.00      | relex |
| 24 | crtl     | 250       | 2082210   | 22500  | 0              | 21.00         | 34                | 62.15           | 71            | 2618           | 0.07      | 0.68     | 0.81         | 0.77       | 0.92     | 1.00      | relex |
